# Supplementary material for: αVβ5 and CD44 Are Oxygen-Regulated Human Embryonic Stem Cell Attachment Factors
Source: Hindawi journal article supplement (doi:10.1155/2013/729281), 2013-01-01
Supplement: f1 [file 729281.f1.pdf]

## **Supplementary file: Deepak Kumar Integrin Manuscript**

*In silico* microarray analysis of a previously published dataset utilising hESC (H1, H9, and RH1) cultured in both 21% O<sub>2</sub> and 2% O<sub>2</sub> was conducted as previously described (44). We note that these are different hESC lines to the one used for all experiments conducted in this study however we, and others, have demonstrated that culture in reduced oxygen resulted in reduced transcriptional heterogeneity between hESC lines thus validating our use of an independent hESC line (45). Data was then sorted by gene name, relative expression values of <10 removed, and multiple probe hits deleted after generating averaged values.

**Supplementary Table 1.** Microarray signal intensity values for all integrins and CD44-related genes in hESCs cultured in physiological normoxia (2% O<sub>2</sub>) and hyperoxia (21% O<sub>2</sub>). Normalisation was performed against baseline signal using the D Chip platform as described in Forsyth et al 2008 (44).

| <b>Gene Symbol (Gene Name)</b>                         | <b>2% O<sub>2</sub></b> | <b>21% O<sub>2</sub></b> | <b>P Value</b>     | <b>Fold Change</b> |
|--------------------------------------------------------|-------------------------|--------------------------|--------------------|--------------------|
| ITGB1BP2 (Integrin $\beta$ 1 binding protein 2)        | 16.25                   | 11.79                    | 0.14               | 1.38               |
| AaeL-AAEL007077 (Integrin $\beta$ 1 binding protein 1) | 212.15                  | 177.21                   | $7 \times 10^{-3}$ | 1.20               |
| ITGB1BP3 (Integrin $\beta$ 1 binding protein 3)        | 496.54                  | 544.12                   | 0.47               | 1.10               |
| ITGB3BP (Integrin $\beta$ 3 binding protein)           | 595.30                  | 545.43                   | $3 \times 10^{-3}$ | 1.09               |
| LOC658655 (Integrin $\beta$ 4 binding protein)         | 1354.68                 | 1074.23                  | 0.02               | 1.26               |
| ITGA1 (Integrin $\alpha$ 1)                            | 25.87                   | 27.10                    | 0.77               | 1.05               |
| ITGA10 (Integrin $\alpha$ 10)                          | 39.93                   | 34.89                    | 0.43               | 1.14               |
| ITGA11 (Integrin $\alpha$ 11)                          | 88.46                   | 91.98                    | 0.65               | 1.04               |
| ITGA2 (Integrin $\alpha$ 2)                            | 21.55                   | 28.47                    | 0.24               | 1.32               |

|                               |         |         |                    |      |
|-------------------------------|---------|---------|--------------------|------|
| ITGA2B (Integrin $\alpha$ 2b) | 64.27   | 67.22   | 0.63               | 1.05 |
| ITGA4 (Integrin $\alpha$ 4)   | 23.37   | 18.80   | 0.35               | 1.24 |
| ITGA5 (Integrin, $\alpha$ 5)  | 182.51  | 134.33  | 0.04               | 1.36 |
| ITGA6 (Integrin $\alpha$ 6)   | 1229.82 | 938.91  | $2 \times 10^{-4}$ | 1.31 |
| ITGA7 (Integrin $\alpha$ 7)   | 163.05  | 117.39  | 0.24               | 1.39 |
| ITGA8 (Integrin $\alpha$ 8)   | 34.53   | 43.15   | 0.09               | 1.25 |
| ITGA9 (Integrin $\alpha$ 9)   | 43.93   | 28.54   | 0.01               | 1.54 |
| ITGAD (Integrin $\alpha$ D)   | 20.82   | 11.50   | 0.05               | 1.81 |
| ITGAE (Integrin $\alpha$ E)   | 553.67  | 423.84  | $3 \times 10^{-4}$ | 1.31 |
| ITGA11 (Integrin L)           | 16.06   | 15.69   | 0.88               | 1.02 |
| ITGAM (Integrin $\alpha$ M)   | 21.03   | 19.04   | 0.48               | 1.11 |
| ITGAV (Integrin $\alpha$ V)   | 851.72  | 524.89  | $1 \times 10^{-4}$ | 1.64 |
| ITGB1 (Integrin $\beta$ 1)    | 4691.45 | 3910.88 | 0.03               | 1.20 |
| ITGB2 (Integrin $\beta$ 2)    | 47.30   | 51.05   | 0.53               | 1.08 |
| ITGB3 (Integrin $\beta$ 3)    | 45.74   | 36.88   | 0.25               | 1.24 |
| ITGB4 (Integrin $\beta$ 4)    | 51.26   | 46.43   | 0.26               | 1.10 |
| ITGB5 (Integrin $\beta$ 5)    | 1927.06 | 1662.95 | $1 \times 10^{-3}$ | 1.16 |
| ITGB6 (Integrin $\beta$ 6)    | 6.52    | 12.10   | 0.11               | 1.86 |

|                                                                           |        |        |                    |      |
|---------------------------------------------------------------------------|--------|--------|--------------------|------|
| ITGB7 (Integrin $\beta$ 7)                                                | 25.14  | 21.48  | 0.42               | 1.17 |
| ITGB8 (Integrin $\beta$ 8)                                                | 17.36  | 16.89  | 0.82               | 1.03 |
| ITGBL1 (Integrin $\beta$ -like 1)                                         | 36.32  | 34.09  | 0.39               | 1.07 |
| IIK (Integrin-linked kinase)                                              | 796.20 | 756.35 | 0.38               | 1.05 |
| IIKAP (Integrin-linked kinase-associated serine/threonine phosphatase 2C) | 191.87 | 183.45 | 0.31               | 1.05 |
| CD44 molecule (Indian blood group)                                        | 54.08  | 42.64  | 0.37               | 1.27 |
| HAPLN3 (Hyaluronan and proteoglycan link protein 3)                       | 87.09  | 78.79  | 0.05               | 0.90 |
| HMMR (Hyaluronan-mediated motility receptor, RHAMM)                       | 269.57 | 385.62 | $3 \times 10^{-5}$ | 1.43 |
| HYAL2 (Hyaluronoglucosaminidase 2)                                        | 415.54 | 519.13 | $9 \times 10^{-3}$ | 1.25 |

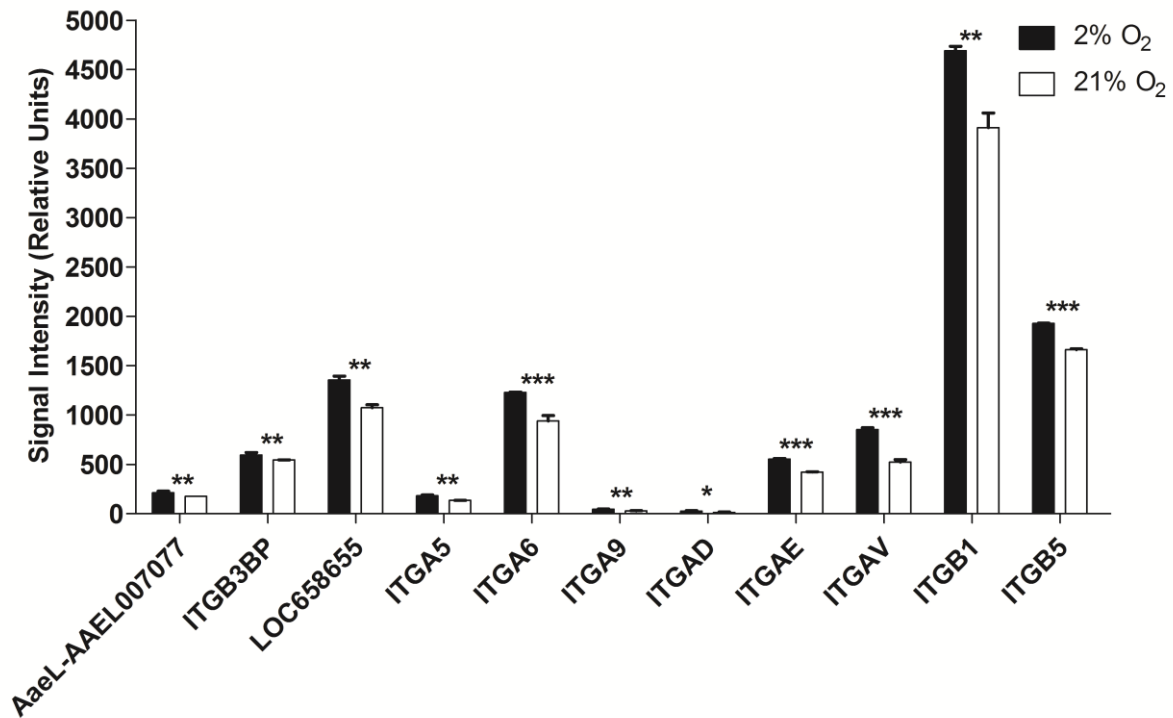

### Supplementary Figure 1. Integrin blocking effects on hESCs attachment

hESCs cultured in 2% O<sub>2</sub> or 21% O<sub>2</sub> and pre-incubated with anti- (A) α6, (B) αE, (C) αV, (D) β5, (E) αVβ5 and (F) CD44 antibodies. (n=6); \* p < 0.05, \*\* p < 0.01, \*\*\* p < 0.001. y-axis indicates % of input cell attachment post-antibody blocking after 24 hours. Black and open bars indicate % of cell attachment in 2% O<sub>2</sub> and 21% O<sub>2</sub> after antibody blocking treatment, respectively. Error bars indicate standard deviations (SD). (G) Cell attachment data normalised to unblocked controls. Asterisks indicate significant differences to unblocked controls. Values indicate mean percentage of cell attachment (n=6); \* p < 0.05, \*\* p < 0.01 and \*\*\* p < 0.001, a < 0.05 and b < 0.01 indicate significant differences due to oxygen tension (comparison between 21% O<sub>2</sub> and 2% O<sub>2</sub> for each integrin sub-unit). Error bars indicate standard error (SE).
